# Supplementary material
Source: Springer Nature journal article supplement (https://www.springermedizin.de/resource/supplementary/12889_2013_6124_MOESM6_ESM.pdf/9494478)

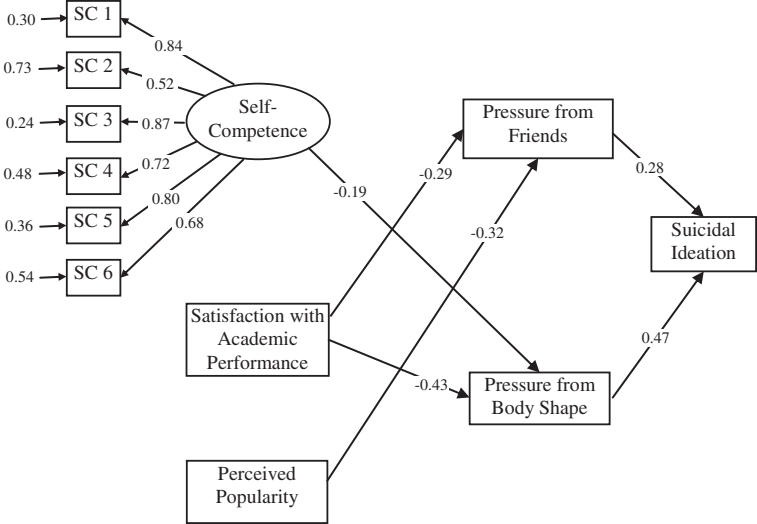

Supplement: MOESM6 [file 9494478]
